# Supplementary material for: Sampling strategies and post-processing methods for increasing the time resolution of organic aerosol measurements requiring long sample collection times
Source: Copernicus journal article supplement (doi:10.5194/amt-2015-332), 2016-01-14
Supplement: Supplementary file 1 [file amt-2015-332-supplement.pdf]

## Section S1: Detection limits and sampling times

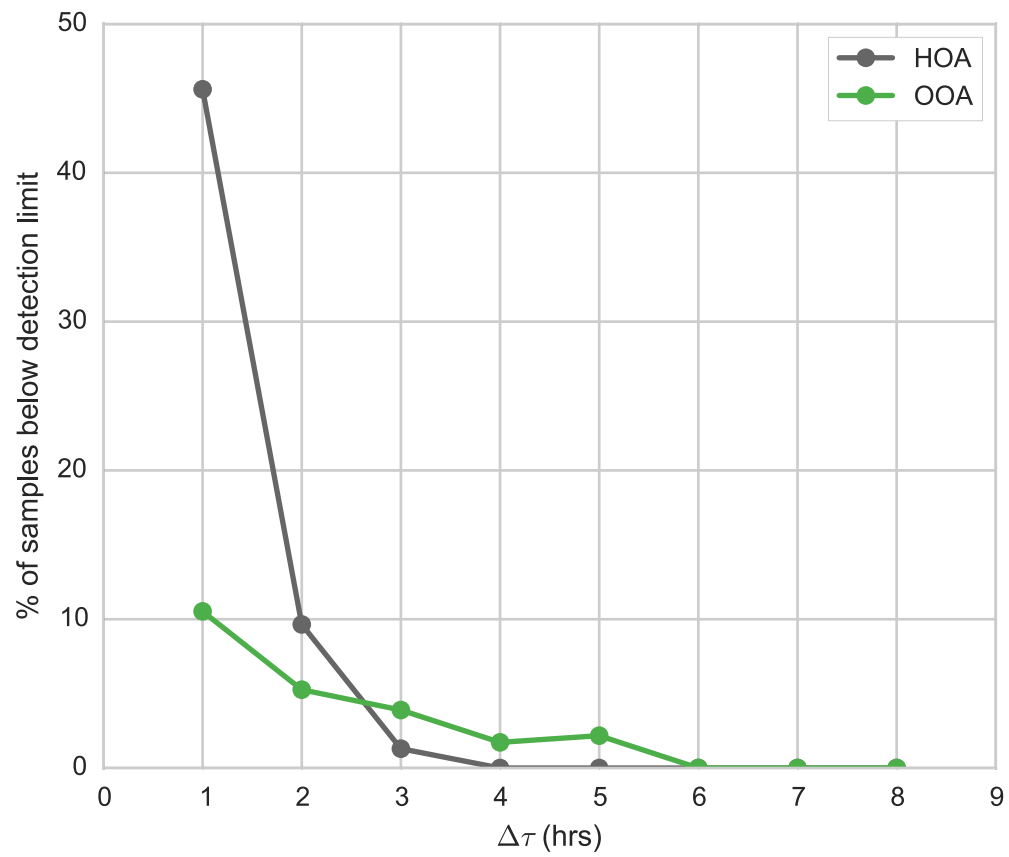

**Figure S1.** The percentage of HOA and OOA measurement samples below detection limit as a function of the sampling interval  $\Delta\tau$ . Detection limits are defined as 3 times the constant error term expressed as a concentration ( $\sigma_{\theta,c}$ ).

## Section S2: Additional sequential sampling results

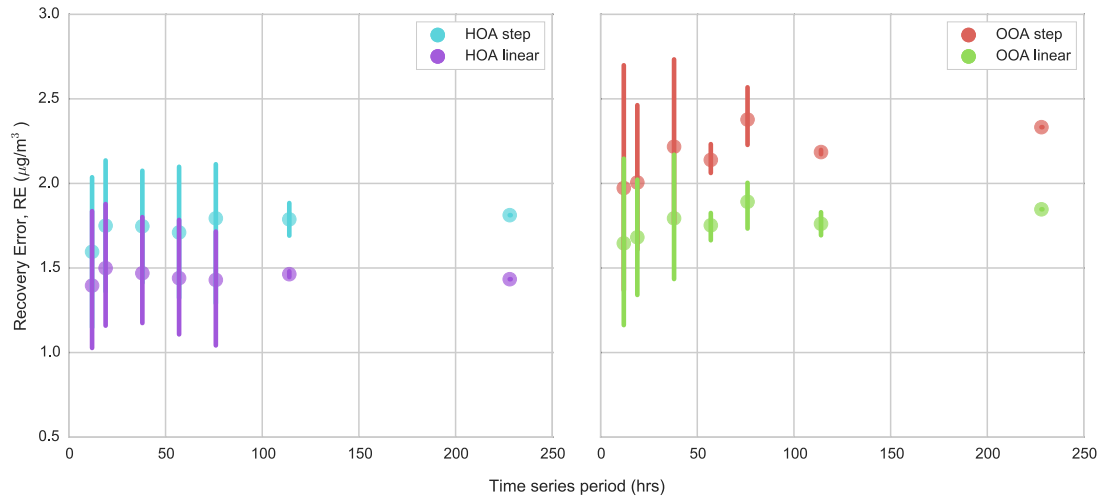

**Figure S2.** Mean Recovery error ( $RE$ ) as a function of the time series period  $T$  for HOA and OOA time series constructed by step and linear interpolation between sequential measurements of length ( $\Delta\tau$ ) 4 hours.  $\kappa_m = 20\%$ . The vertical bars represent 95% confidence intervals determined by bootstrapping the mean estimates.

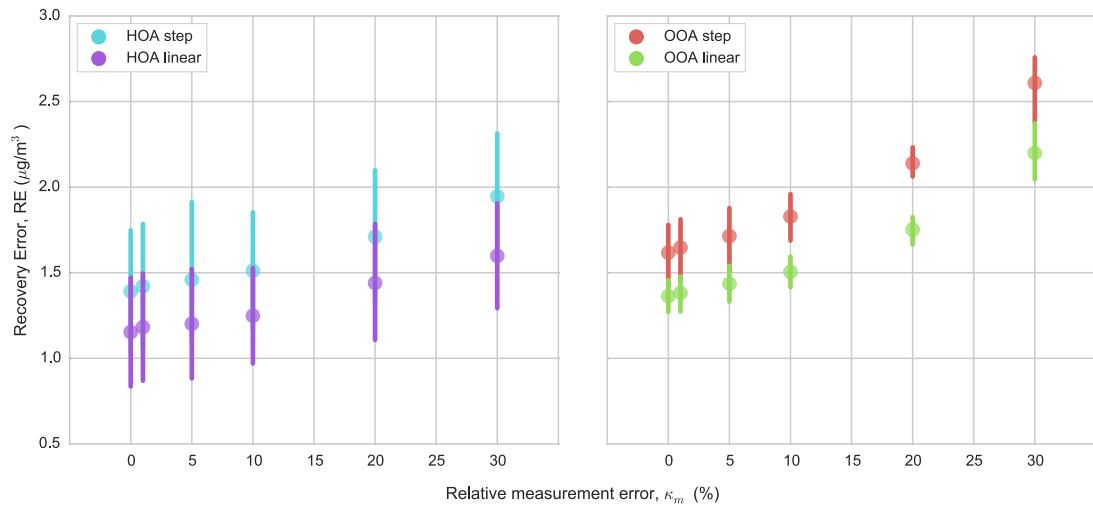

**Figure S3.** Mean Recovery error ( $RE$ ) as a function of the relative measurement error  $\kappa_m$  for HOA and OOA time series constructed by step and linear interpolation between sequential measurements of length ( $\Delta\tau$ ) 4 hours.  $T = 57$  hours, meaning each data point is an average over 4 ( $=228/57$ ) time series segments. The vertical bars represent 95% confidence intervals determined by bootstrapping the mean estimates.

## Section S3: Additional deconvolution results

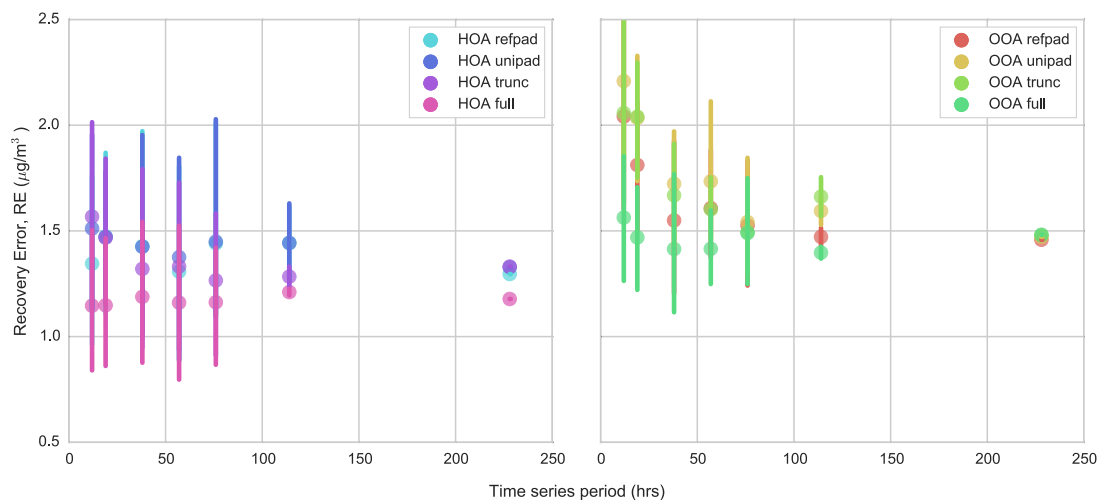

**Figure S4.** Mean Recovery error ( $RE$ ) as a function of the time series period  $T$  for HOA and OOA time series constructed by deconvolution with TSVD regularization of staggered measurements of length ( $\Delta\tau$ ) 4 hours.  $\kappa_m = 20\%$ . The boundary value methods are full; trunc, truncated; unipad, uniformly padded; and reypad, reflectively padded. The vertical bars represent 95% confidence intervals determined by bootstrapping the mean estimates.

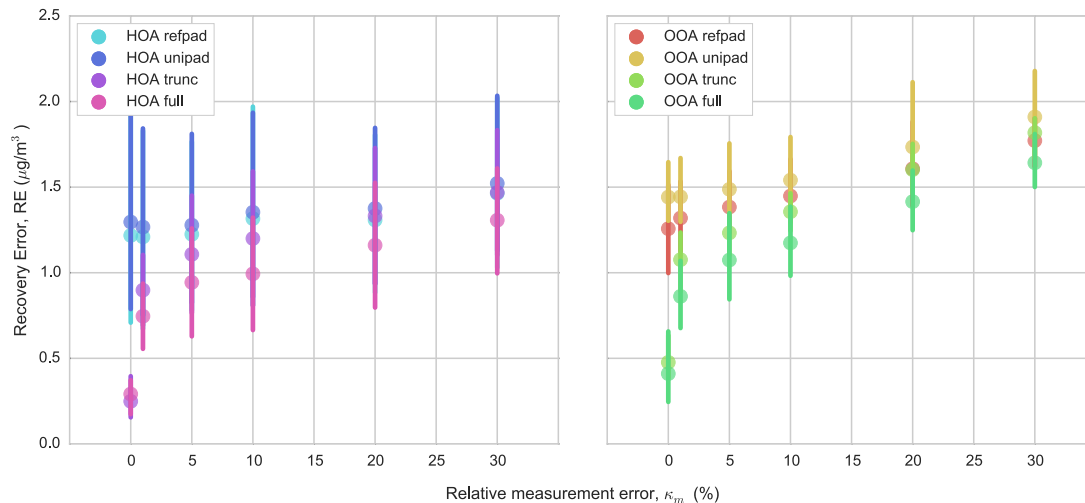

**Figure S5.** Mean Recovery error ( $RE$ ) as a function of the relative measurement error  $\kappa_m$  for HOA and OOA time series constructed by deconvolution with TSVD regularization of staggered measurements of length ( $\Delta\tau$ ) 4 hours.  $T = 57$  hours, meaning each data point is an average over 4 ( $=228/57$ ) time series segments. The boundary value methods are full; trunc, truncated; unipad, uniformly padded; and reypad, reflectively padded. The vertical bars represent 95% confidence intervals determined by bootstrapping the mean estimates.
